# Supplementary material for: Spin-Labeled Diclofenac: Synthesis and Interaction with Lipid Membranes
Source: MDPI journal article supplement (doi:10.3390/molecules28165991), 2023-08-10
Supplement: s1 [file s1]

## Supplementary Materials

# Spin-labeled Diclofenac: Synthesis and Interaction with Lipid Membranes

Denis S. Baranov,<sup>1</sup> Anna S. Kashnik,<sup>1</sup> Anastasiya N. Atnyukova,<sup>2</sup> Sergei A. Dzuba<sup>1\*</sup>

<sup>1</sup> Voevodsky Institute of Chemical Kinetics and Combustion, SB RAS, 630090 Novosibirsk, Russian Federation;

<sup>2</sup> Department of Physics, Novosibirsk State University, 630090 Novosibirsk, Russian Federation.

\* Correspondence: [dzuba@kinetics.nsc.ru](mailto:dzuba@kinetics.nsc.ru)

### Table of Contents

|                                                                                                                                            |    |
|--------------------------------------------------------------------------------------------------------------------------------------------|----|
| <b>Figure S1.</b> <sup>1</sup> H-NMR spectrum of compound <b>2</b> in DMSO-D <sub>6</sub> .....                                            | S2 |
| <b>Figure S2.</b> <sup>1</sup> H-NMR spectrum of compound <b>3</b> in CDCl <sub>3</sub> .....                                              | S3 |
| <b>Figure S3.</b> <sup>13</sup> C-NMR spectrum of compound <b>3</b> in CDCl <sub>3</sub> .....                                             | S3 |
| <b>Figure S4.</b> <sup>1</sup> H-NMR spectrum of compound <b>4</b> in CDCl <sub>3</sub> .....                                              | S4 |
| <b>Figure S5.</b> <sup>13</sup> C-NMR spectrum of compound <b>4</b> in CDCl <sub>3</sub> .....                                             | S4 |
| <b>Figure S6.</b> <sup>1</sup> H-NMR spectrum of compound <b>1</b> in CDCl <sub>3</sub> .....                                              | S5 |
| <b>Figure S7.</b> <sup>1</sup> H-NMR spectrum of compound <b>1</b> in CDCl <sub>3</sub> after one month of storage in the environment..... | S5 |
| <b>Figure S8.</b> <sup>13</sup> C-NMR spectrum of compound <b>1</b> in CDCl <sub>3</sub> .....                                             | S6 |

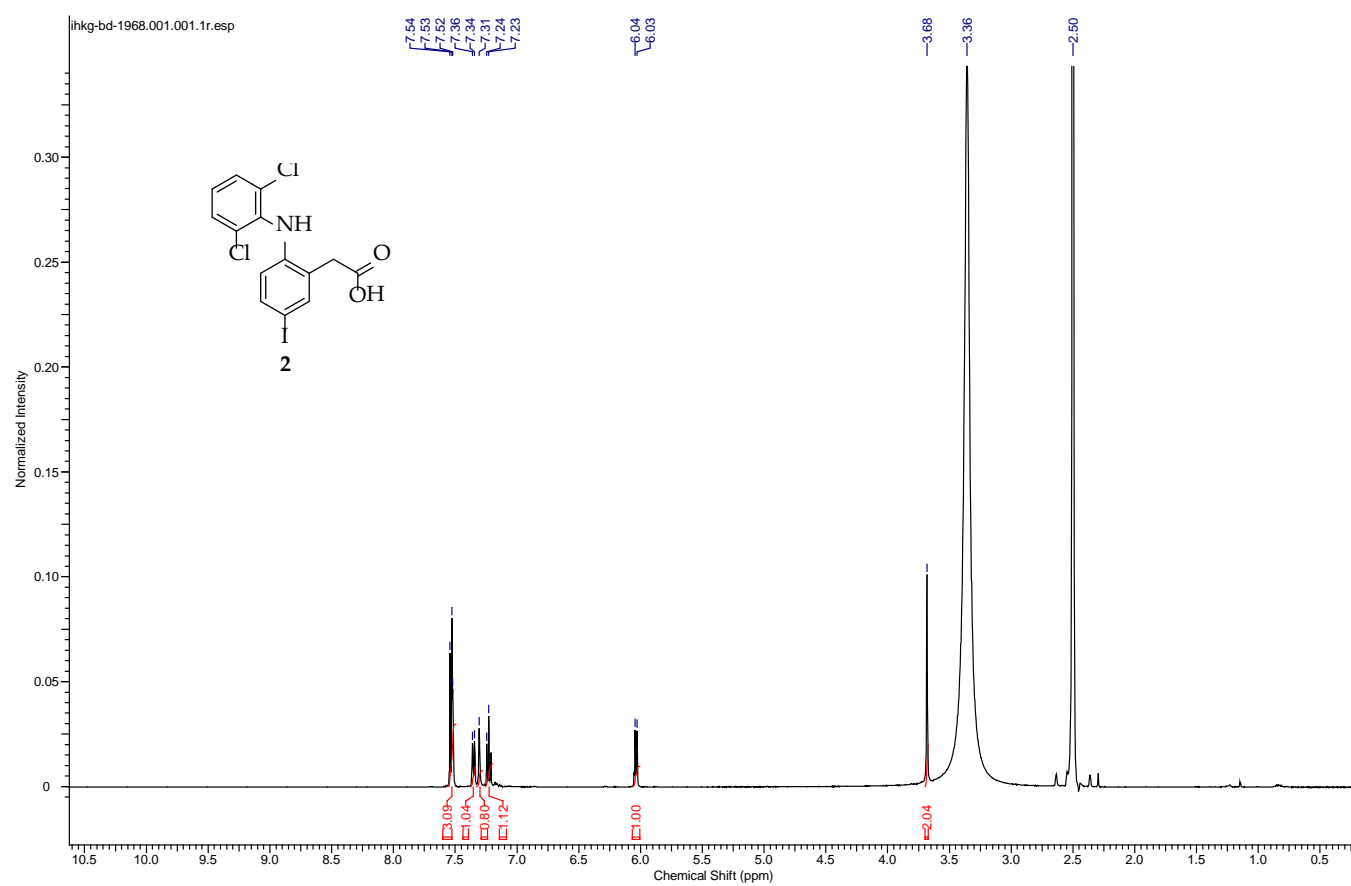

**Figure S1.**  $^1\text{H}$ -NMR spectrum of compound 2 in  $\text{DMSO-D}_6$ .

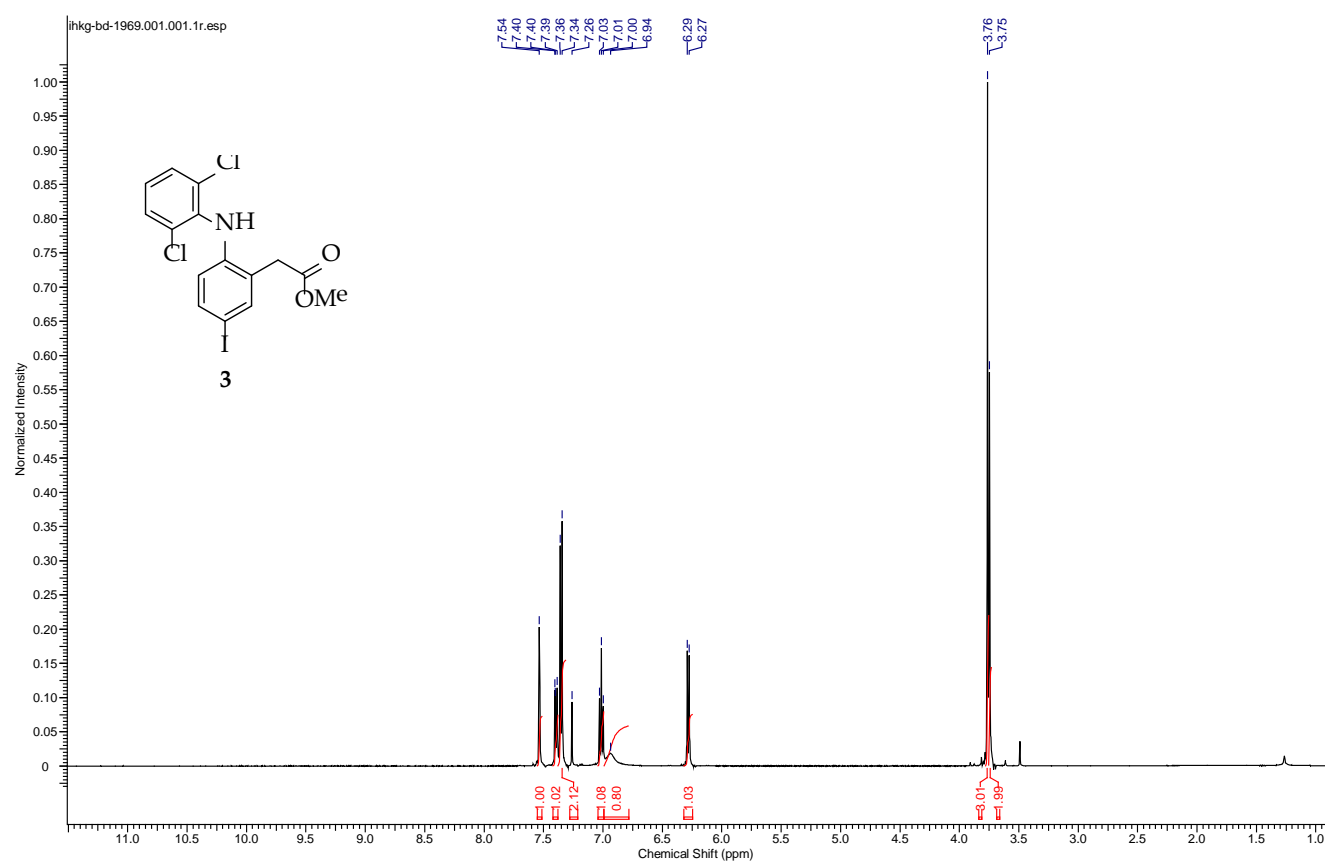

Figure S2.  $^1\text{H}$ -NMR spectrum of compound 3 in  $\text{CDCl}_3$ .

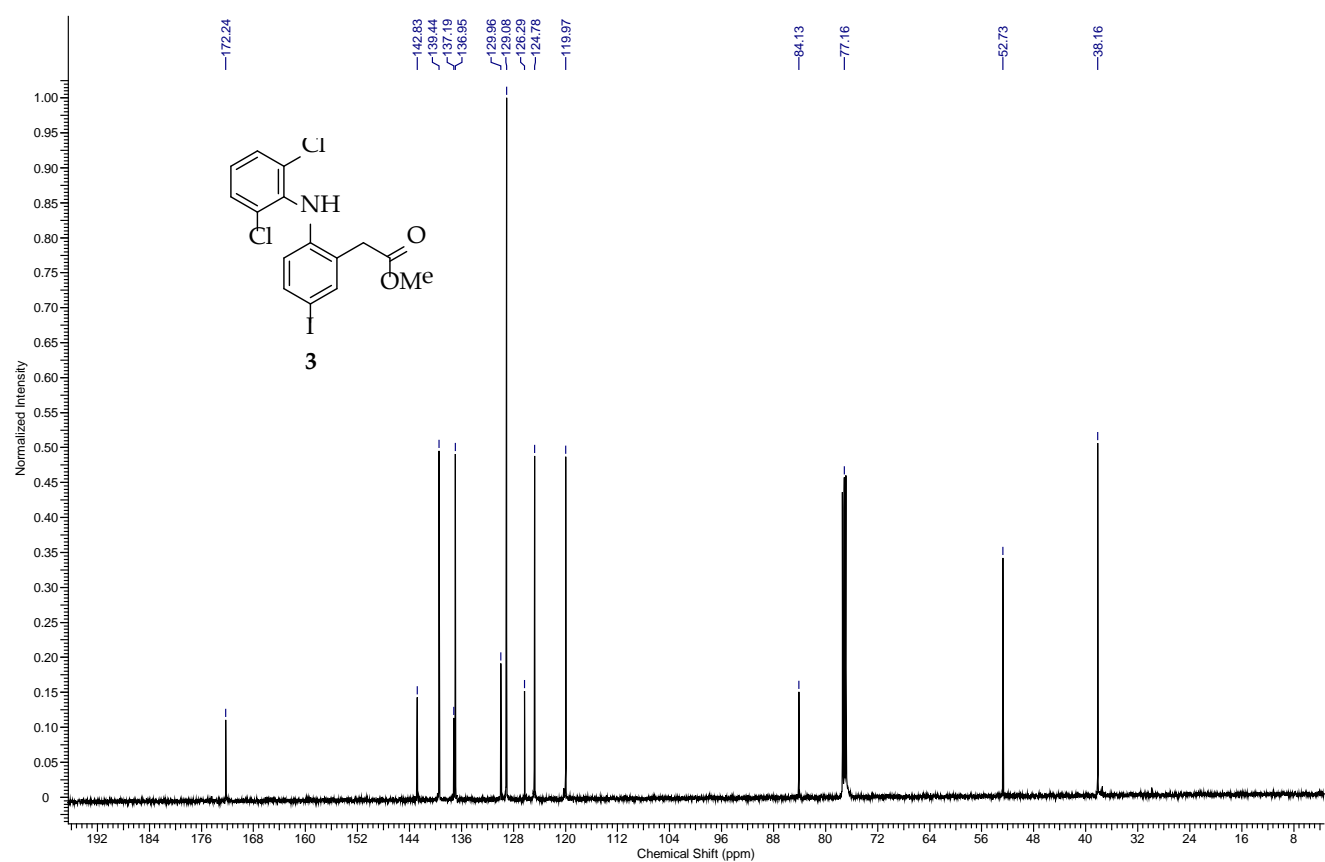

Figure S3.  $^{13}\text{C}$ -NMR spectrum of compound 3 in  $\text{CDCl}_3$ .

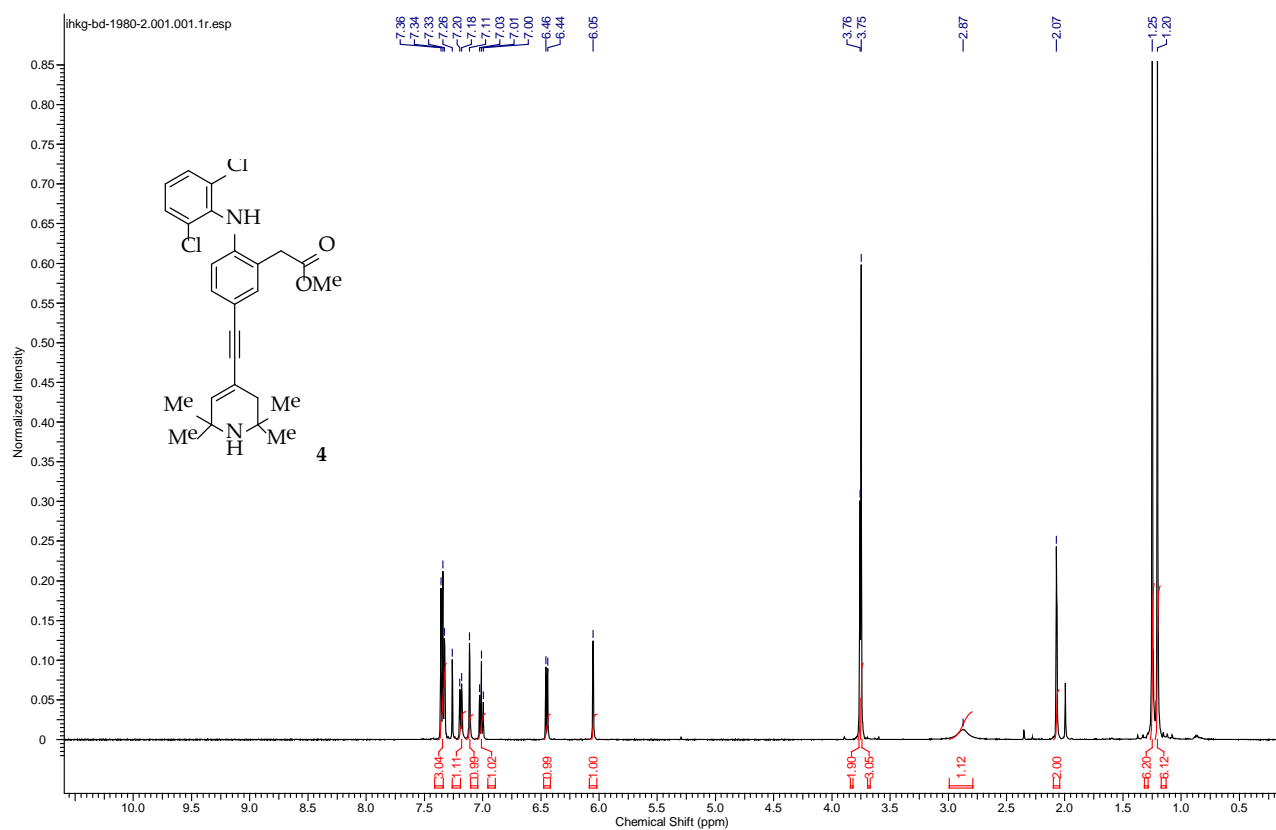

**Figure S4.** <sup>1</sup>H-NMR spectrum of compound **4** in CDCl<sub>3</sub>.

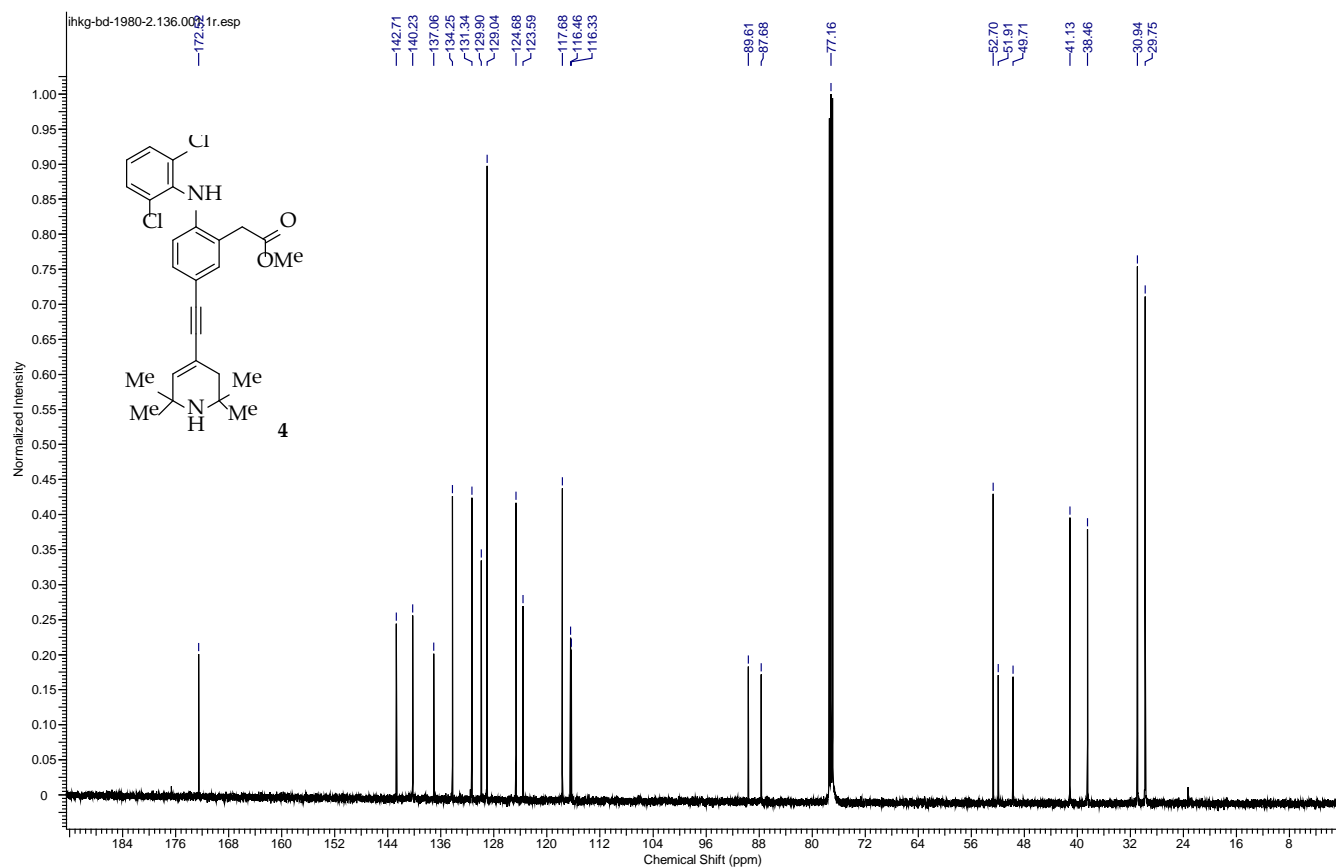

**Figure S5.** <sup>13</sup>C-NMR spectrum of compound **4** in CDCl<sub>3</sub>.

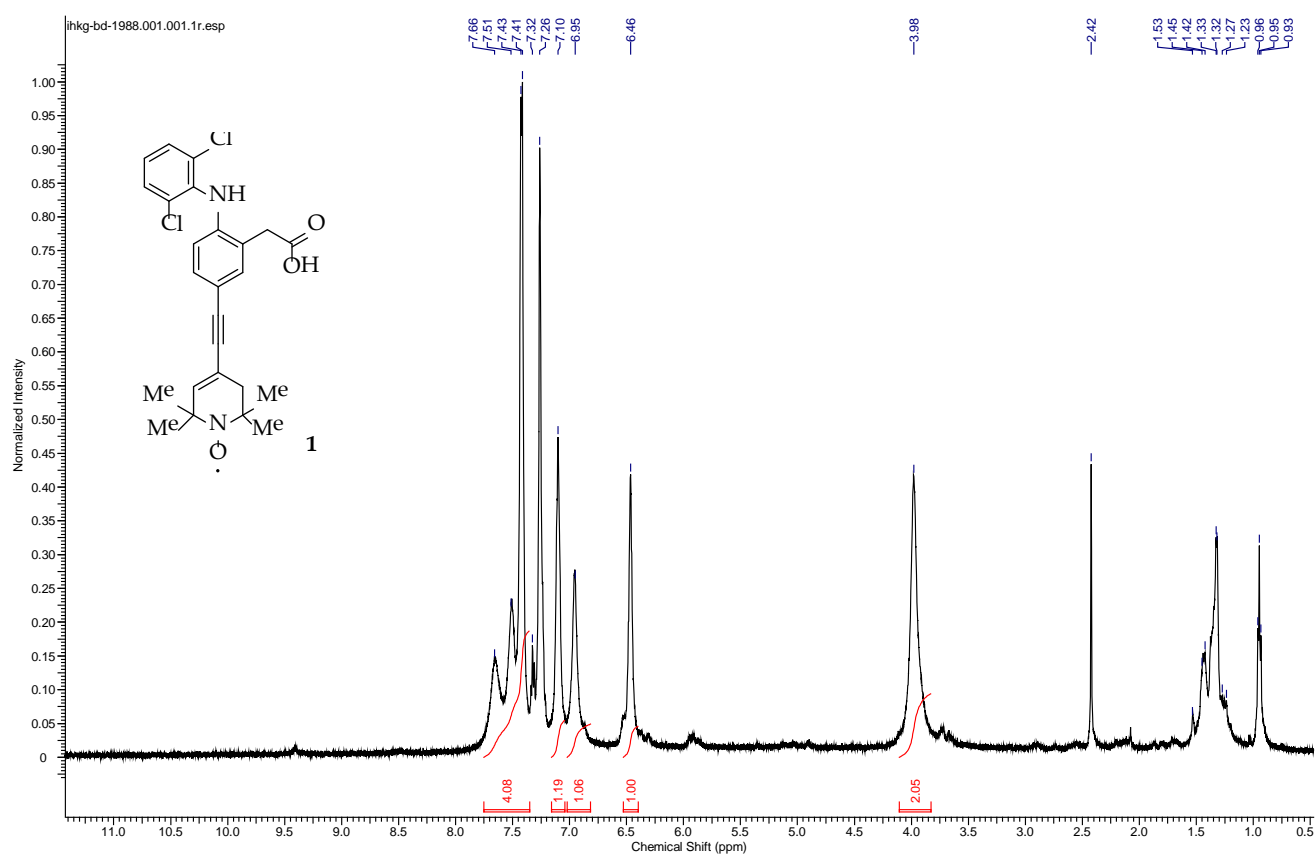

**Figure S6.**  $^1\text{H}$ -NMR spectrum of compound **1** in  $\text{CDCl}_3$ .

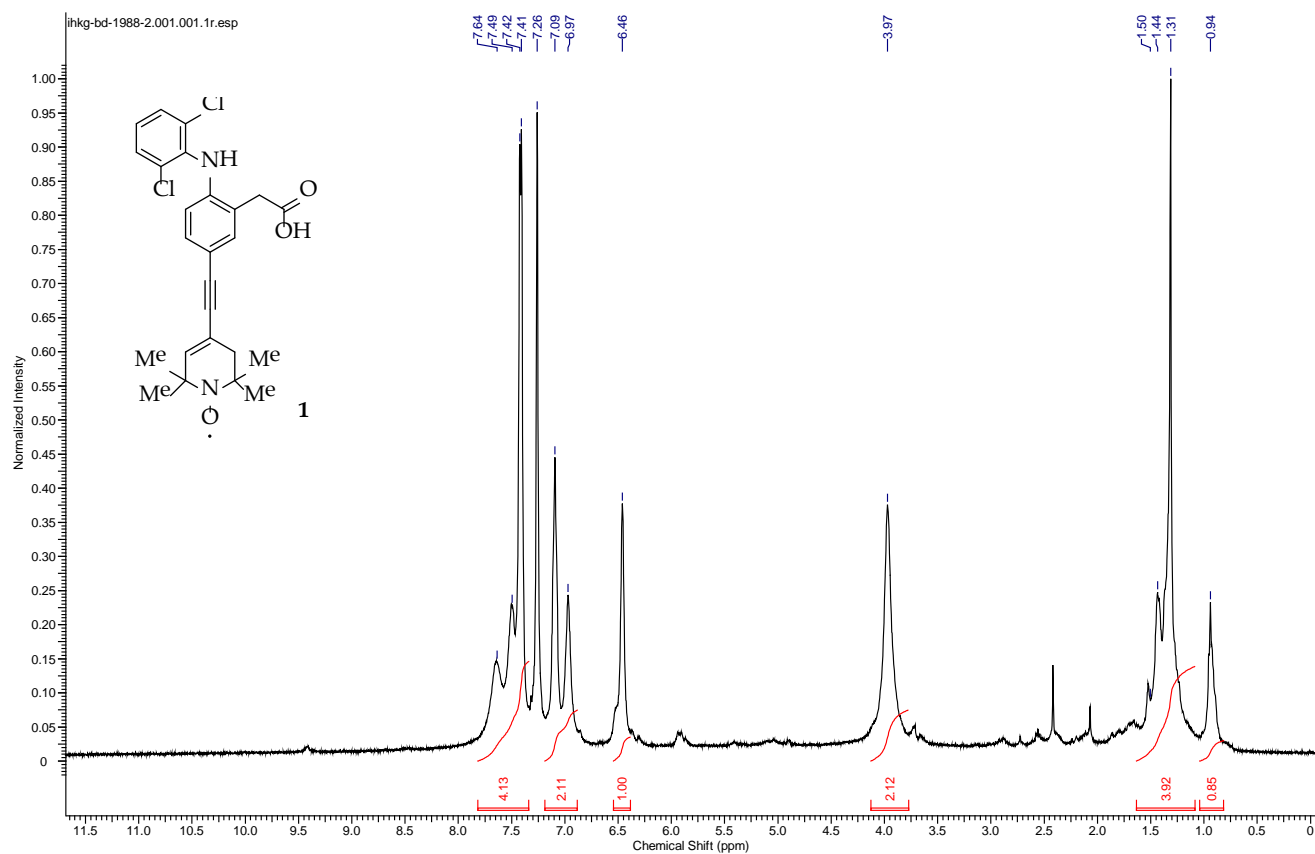

**Figure S7.**  $^1\text{H}$ -NMR spectrum of compound **1** in  $\text{CDCl}_3$  after one month of storage in the environment.

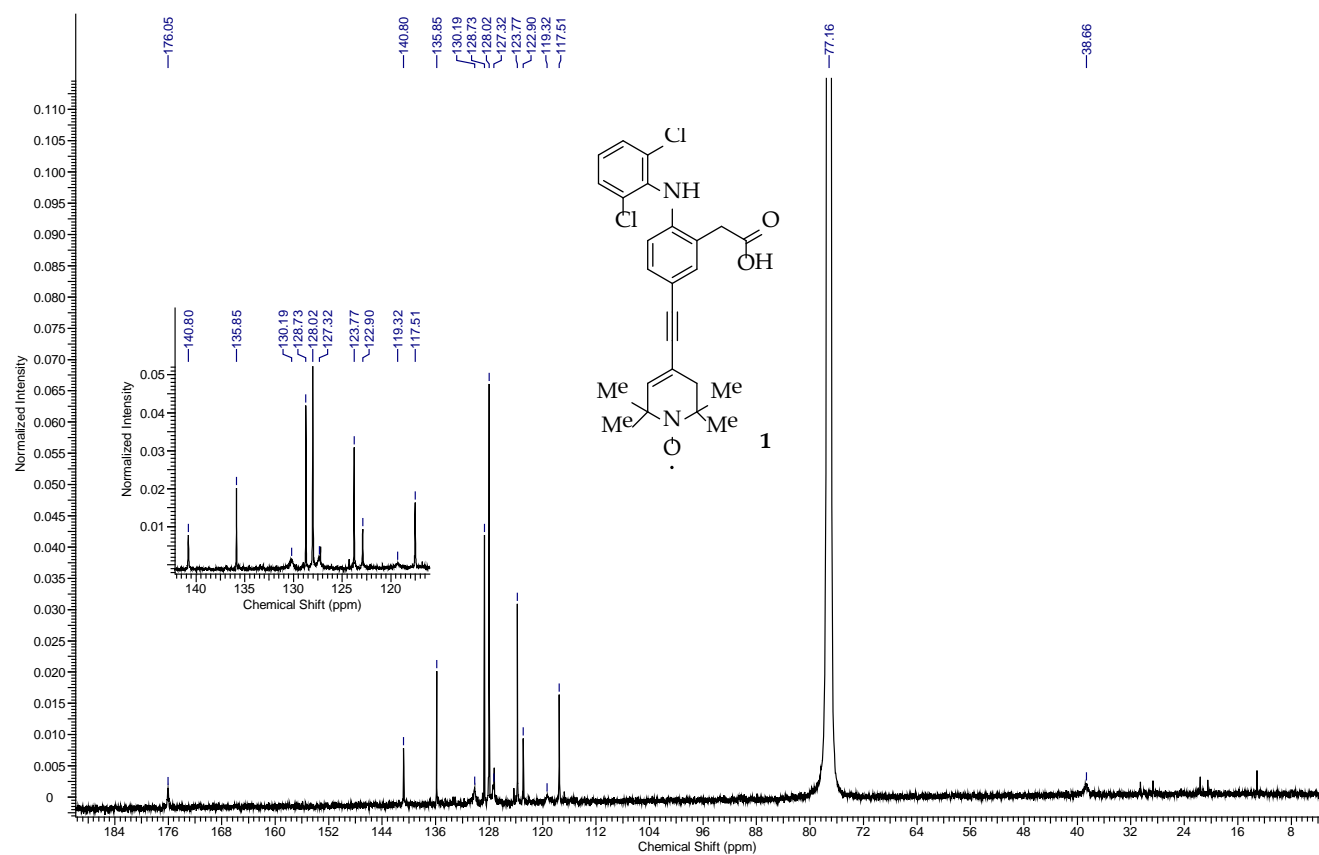

**Figure S8.** <sup>13</sup>C-NMR spectrum of compound **1** in CDCl<sub>3</sub>.
